# Supplementary material for: The Doubly Conditioned Frequency Spectrum Does Not Distinguish between Ancient Population Structure and Hybridization
Source: PubMed Central journal article supplement (PMC4032131; doi:10.1093/molbev/msu103), 2014-03-13
Supplement: supp_msu103_DCFS_and_Neadnerthal_Supplementary_20140303.pdf [file supp_msu103_DCFS_and_Neadnerthal_Supplementary_20140303.pdf]

## 1 **Supplementary Material**

### 2 **Methods**

#### 3 ***The demographic model***

4           We represent the joint history of anatomically modern humans and Neandertal with a  
5 spatially structured stepping stone model (Fig. 2c), using the same setup adopted by Eriksson and  
6 Manica (2012). Briefly, we consider a common ancestor of the two hominins which occupied a string  
7 of demes (separated by 100 kilometres) spanning Africa and Eurasia (130 demes in total). Each deme  
8 contained  $K_0$  individuals and, at each generation (corresponding to 25 years), exchanged  $m_0K_0$   
9 migrants with its two adjacent neighbours. At 320 kya, the range was split into two areas, Africa  
10 (where anatomically modern humans evolved) and Eurasia (the home of Neandertal), by placing a  
11 barrier at deme 70 across which no migration was allowed (thus generating two separate strings of  
12 demes, one 70 demes long representing Africa, and one 60 demes long representing Eurasia).

13           At time  $t_{\text{modern}}$ , when anatomically modern humans were still confined to Africa, the  
14 demographic parameters were changed to modern values, with carrying capacity going from  $K_0$  to  $K$   
15 and migration rate from  $m_0$  to  $m$ . At  $t_{\text{exit}}$ , the barrier preventing the exit out of Africa was removed,  
16 and modern humans were allowed to colonise Eurasia. This process occurred over a branch of the  
17 stepping stone model parallel to the Eurasian line already occupied by Neandertal (thus allowing the  
18 coexistence of the two hominins), but in this case extending 260 demes (to represent the full stretch  
19 from into the Americas), instead of the 60 demes used to represent the more limited Eurasian  
20 Neandertal range. The spread of AMHs into Eurasia occurred via sequential founder events, with  
21 new demes being colonised by  $cK$  new individuals. After colonisation, the population sizes grew by  
22  $rK$  individuals per generation, until they reached  $K$ . Each pair of adjacent occupied demes exchanged  
23  $N_{\text{min}}$  migrants per generation, where  $N_{\text{min}}$  represent the smaller of the two population sizes.

#### 24 ***Parameterising the model***

25           Since our aim is to explore the expected patterns of *dcfs* under a null scenario of population  
26 structure, it is crucial to choose demographic parameters that provide a realistic representation of  
27 present and past structure. We fitted our model to estimates of within and between population  
28 Time to Most Recent Common Ancestor (TMRCA) from the HGDP-CEPH panel (Cann et al. 2002),  
29 which includes over 1000 individuals from 51 populations across the globe. The HGDP-CEPH panel  
30 arguably provides the best overview of global genetic diversity in modern humans. Thus, we restrict  
31 our analysis to demographic parameters that are compatible with the genetic variation of modern  
32 humans.

33           TMRCA were calculated from the mean square difference of repeat counts in di- and tri-  
34 nucleotide microsatellite markers (Eriksson and Manica 2011), genotyped in individuals from the  
35 HGDP-CEPH panel. Di-nucleotide markers were calibrated using the mutation rate of Dib et al.  
36 (1996),  $\mu = 1.52 \times 10^{-3}$  single-step mutations per 27 years (i.e.  $\mu = 1.41 \times 10^{-3}$  per generation). TMRCA  
37 of tri-nucleotide markers were scaled to match the average TMRCA of the di-nucleotide markers  
38 (Eriksson and Manica 2011).

39           The predicted TMRCA for a given parameter combination was calculated as follows: we first  
40 ran the demographic model described in the previous section, and then generated 100 gene  
41 genealogies for 10 individuals in each of the 51 populations corresponding to the HGDP-CEPH  
42 populations in our data [placed according to the deme corresponding to the distance from a location  
43 in sub-Saharan Africa, calculated using shortest distances on land as in Prugnolle et al. (2005)]. We  
44 then traced gene genealogies backwards in time, generation by generation, assuming diploid,  
45 random mating within each colonised deme, and with migration probabilities to neighbouring demes  
46 given by the demographic model.

47           We fitted our model in the Approximate Bayesian Computation (ABC) framework, using the  
48 ABC-GLM algorithm implemented in the ABCtoolbox software (Wegmann et al. 2010). We generated  
49 six summary statistics from the average TMRCA between continents. We treated Europe and Central

50 Asia as one continent (Eurasia), and East Asia as a separate continent. Because Oceania only has two  
51 populations (both in Papua New Guinea), we included these populations in the East Asian set. Our  
52 summary statistics are thus  $T_{\text{Africa,Eurasia}}$ ,  $T_{\text{Africa,EastAsia}}$ ,  $T_{\text{Africa,America}}$ ,  $T_{\text{Eurasia,EastAsia}}$ ,  $T_{\text{Eurasia,America}}$ , and  
53  $T_{\text{America,America}}$  (empirical values are 176.1 kya, 143.9 kya, 131.7 kya, and 105.7 kya, respectively).

54 We started by randomly sampling 2.2 million parameter values from the following ranges:  
55  $m \in [10^{-6}, 0.33]$ ,  $c \in [10^{-4}, 0.33]$ ,  $r \in [0.01, 1]$ ,  $K \in [10, 10^5]$ ,  $K_0 \in [10, 10^5]$ ,  $m_0 \in [10^{-6}, 0.33]$ ,  
56  $t_{\text{modern}} \in [100, 200]$  (k years ago) and  $t_{\text{exit}} \in [40, 80]$  (k years ago). All parameters (with the  
57 exception of  $t_{\text{modern}}$  and  $t_{\text{exit}}$ ) were log-transformed to ensure an adequate exploration of the large  
58 ranges of possible values. We further imposed (through rejection sampling) the constraint  
59  $cK < K/2$  (cannot send out more colonists than individuals). Finally, we used ABC to estimate the  
60 likelihood of the 0.05% best-fitting parameter combinations [corresponding to 1115 parameter  
61 combinations; the same ones we used in Eriksson and Manica (2012)], and to generate parameter  
62 posterior distributions [see Fig. S2 in Eriksson and Manica (2012)]. This set was further subsetted to  
63 focus on parameter combinations that predicted  $D$  between Africans and Europeans to be within  
64 0.0020 units of the observed value 0.0457.

### 65 **Quantifying $dcfs$**

66 We estimated the predicted  $dcfs$  for the best-fitting demographic parameter combinations,  
67 weighted by their likelihood as estimated by ABC. We should emphasize that we did not fit the  
68 model to the observed  $dcfs$ , but rather used realistic parameter combinations (based on the global  
69 distribution of genetic variation in modern populations) to predict  $dcfs$  under a null scenario without  
70 hybridisation. We attempted to match the sample design of Yang *et al.* (2012) as closely as possible.  
71 For each demographic parameter combination, we simulated 10 million unlinked SNPs in one African  
72 genome (placed in deme 10), five North European genomes (from deme 120), and the Neandertal  
73 genome (in deme 27 of their Eurasian range, corresponding to deme 97 of the AMHs longer chain).  
74 As in Eriksson and Manica (2012), we chose deme 27 as it represents the distance between the

75 Vindija cave in Croatia (the location of the material from which the Neandertal genome was  
76 extracted) and the point where the Neandertal branch separates from the human branch in the  
77 Middle East. Similarly, the other populations were chosen based on their distance from a putative  
78 sub-Saharan origin chosen as -12° latitude and 25° longitude based on Manica et al (Manica et al.  
79 2007). We filtered the simulated SNPs for those compatible with the *dcfs* criteria, and then  
80 calculated the *dcfs* using the frequency of the Neandertal allele in the European genomes for each  
81 SNP. The ten best parameter combinations are shown in table S1, and the corresponding *dcfs* values  
82 are shown in table S2 (along with the empirical *dcfs* and the two models of Yang *et al.* shown in  
83 figure 3).

#### 84 **References**

- 85 Cann HM, de Toma C, Cazes L, et al. 2002. A human genome diversity cell line panel. *Science*  
86 296:261–262.
- 87 Dib C, Fauré S, Fizames C, et al. 1996. A comprehensive genetic map of the human genome based on  
88 5,264 microsatellites. *Nature* 380:152–154.
- 89 Eriksson A, Manica A. 2011. Detecting and Removing Ascertainment Bias in Microsatellites from the  
90 HGDP-CEPH Panel. *G3-Genes Genomes Genet.* 1:479–488.
- 91 Eriksson A, Manica A. 2012. Effect of ancient population structure on the degree of polymorphism  
92 shared between modern human populations and ancient hominins. *Proc. Natl. Acad. Sci.*  
93 109:13956–13960.
- 94 Manica A, Amos W, Balloux F, Hanihara T. 2007. The effect of ancient population bottlenecks on  
95 human phenotypic variation. *Nature* 448:346–348.
- 96 Prugnolle F, Manica A, Balloux F. 2005. Geography predicts neutral genetic diversity of human  
97 populations. *Curr. Biol.* 15:R159–60.
- 98 Wegmann D, Leuenberger C, Neuenschwander S, Excoffier L. 2010. ABCtoolbox: a versatile toolkit  
99 for approximate Bayesian computations. *BMC Bioinformatics* 11.
- 100 Yang MA, Malaspinas A-S, Durand EY, Slatkin M. 2012. Ancient structure in Africa unlikely to explain  
101 neanderthal and non-african genetic similarity. *Mol. Biol. Evol.* 29:2987–2995.

102

103

104 **Table S1 Parameter values for the ten best fits to the empirical dcfs spectrum.**

| <i>K</i> | <i>K</i> <sub>0</sub> | <i>r</i> | <i>c</i>  | <i>m</i> | <i>m</i> <sub>0</sub> | <i>t</i> <sub>exit</sub> | <i>t</i> <sub>modern</sub> |
|----------|-----------------------|----------|-----------|----------|-----------------------|--------------------------|----------------------------|
| 1021.4   | 21.939                | 0.671    | 0.1233    | 0.085233 | 0.11871               | 46                       | 125.48                     |
| 1509.6   | 24.34                 | 0.14167  | 0.040777  | 0.13761  | 0.076934              | 69.6                     | 109.7                      |
| 1244.6   | 27.665                | 0.5085   | 0.098318  | 0.081384 | 0.079035              | 56.6                     | 113.33                     |
| 1062.8   | 14.363                | 0.39598  | 0.10295   | 0.063094 | 0.075023              | 60.425                   | 135.95                     |
| 971.79   | 12.568                | 0.44794  | 0.19421   | 0.096609 | 0.067592              | 56.85                    | 124.38                     |
| 875.23   | 27.686                | 0.21906  | 0.12269   | 0.15869  | 0.063905              | 75.025                   | 105.18                     |
| 21009    | 13.469                | 0.13024  | 0.0054827 | 0.048054 | 0.065207              | 62.175                   | 126.9                      |
| 1325.5   | 28.622                | 0.14714  | 0.13868   | 0.1152   | 0.10608               | 61.825                   | 108.65                     |
| 8452.9   | 22.188                | 0.81569  | 0.007889  | 0.12822  | 0.062028              | 70.575                   | 109.85                     |
| 12822    | 23.16                 | 0.67825  | 0.0084355 | 0.091636 | 0.090976              | 57.9                     | 115.78                     |

105

106 **Table S2 Dcfs values shown in figure 3.**

| Frequency                               | 1     | 2     | 3     | 4     | 5     | 6     | 7     | 8     | 9     |
|-----------------------------------------|-------|-------|-------|-------|-------|-------|-------|-------|-------|
| <b>Empirical</b>                        | 0.284 | 0.162 | 0.116 | 0.092 | 0.086 | 0.075 | 0.064 | 0.062 | 0.059 |
| <b>Yang <i>et al.</i><br/>admixture</b> | 0.278 | 0.159 | 0.111 | 0.089 | 0.079 | 0.074 | 0.072 | 0.069 | 0.070 |
| <b>Yang <i>et al.</i><br/>structure</b> | 0.196 | 0.151 | 0.128 | 0.112 | 0.100 | 0.092 | 0.081 | 0.074 | 0.066 |
|                                         | 0.267 | 0.140 | 0.117 | 0.104 | 0.087 | 0.075 | 0.070 | 0.064 | 0.075 |
|                                         | 0.284 | 0.158 | 0.102 | 0.074 | 0.074 | 0.081 | 0.081 | 0.075 | 0.070 |
|                                         | 0.254 | 0.164 | 0.115 | 0.089 | 0.081 | 0.077 | 0.074 | 0.076 | 0.069 |
|                                         | 0.272 | 0.137 | 0.113 | 0.098 | 0.102 | 0.091 | 0.063 | 0.061 | 0.063 |
| <b>This paper</b>                       | 0.292 | 0.171 | 0.130 | 0.086 | 0.064 | 0.055 | 0.059 | 0.073 | 0.071 |
|                                         | 0.271 | 0.161 | 0.112 | 0.087 | 0.071 | 0.066 | 0.067 | 0.073 | 0.091 |
|                                         | 0.279 | 0.145 | 0.110 | 0.099 | 0.079 | 0.062 | 0.066 | 0.070 | 0.090 |
|                                         | 0.263 | 0.149 | 0.117 | 0.101 | 0.078 | 0.063 | 0.067 | 0.076 | 0.086 |
|                                         | 0.281 | 0.154 | 0.122 | 0.092 | 0.070 | 0.056 | 0.061 | 0.076 | 0.089 |
|                                         | 0.292 | 0.144 | 0.099 | 0.078 | 0.075 | 0.075 | 0.079 | 0.080 | 0.077 |

107

108
